# Supplementary material for: Sequenced Combinations of Cisplatin and Selected Phytochemicals towards Overcoming Drug Resistance in Ovarian Tumour Models
Source: PubMed Central journal article supplement (PMC7589098; doi:10.3390/ijms21207500), 2020-10-12
Supplement: ijms-21-07500-s001.pdf [file ijms-21-07500-s001.pdf]

## Supplementary Materials:

**Table 1.** Characteristics of proteins that have undergone differential expressions in A2780 and A2780<sup>cisR</sup> cell lines following treatment with selected drug combinations using A2780 cell line as reference.

| Mach ID | Protein ID           | Full name                                      | Mascot search results                                                                    | Location                                                          | References                                                                      |
|---------|----------------------|------------------------------------------------|------------------------------------------------------------------------------------------|-------------------------------------------------------------------|---------------------------------------------------------------------------------|
| 3       | CYPA<br>P62937       | Cyclophilin A                                  | Mass: 18001<br>Mascot score: 252<br>Coverage: 53%<br><i>pI</i> : 7.68<br>MS:15<br>MSMS:3 | Cytoplasm                                                         | [15]<br><a href="http://www.matrixscience.com">http://www.matrixscience.com</a> |
| 4       | EIF5A1<br>P63241     | Eukaryotic initiation factor 5A isoform 1      | Mass: 16821<br>Mascot score:168<br>Coverage: 51%<br><i>pI</i> :5.08<br>MS:7<br>MSMS:2    | Cytoplasm<br>Nucleus.<br>Endoplasmic reticulum membrane           | [15]<br><a href="http://www.matrixscience.com">http://www.matrixscience.com</a> |
| 5       | p18<br>P23528        | 18 kDa phosphoprotein                          | Mass: 18491<br>Mascot score: 137<br>Coverage: 42%<br><i>pI</i> : 8.22<br>MS:14<br>MSMS:2 | Nucleus matrix.<br>Cytoplasm,<br>cytoskeleton.<br>cell projection | [15]<br><a href="http://www.matrixscience.com">http://www.matrixscience.com</a> |
| 7       | Op18<br>P16949       | Oncoprotein 18                                 | Mass: 17292<br>Mascot score: 114<br>Coverage: 53%<br><i>pI</i> : 5.76<br>MS:11<br>MSMS:2 | Cytoplasm,<br>cytoskeleton                                        | [15]<br><a href="http://www.matrixscience.com">http://www.matrixscience.com</a> |
| 8       | PRDX1<br>Q06830      | Peroxiredoxin-1                                | Mass: 22096<br>Mascot score: 400<br>Coverage: 59%<br><i>pI</i> : 8.27<br>MS:20<br>MSMS:6 | Cytoplasm                                                         | [15]<br><a href="http://www.matrixscience.com">http://www.matrixscience.com</a> |
| 11      | PGAM1<br>P18669      | Phosphoglycerate mutase 1                      | Mass: 28786<br>Mascot score: 318<br>Coverage: 64%<br><i>pI</i> : 6.67<br>MS:17<br>MSMS:3 |                                                                   | [15]<br><a href="http://www.matrixscience.com">http://www.matrixscience.com</a> |
| 13      | 1433Z<br>P63104      | 14-3-3 protein zeta/delta                      | Mass: 27728<br>Mascot score: 216<br>Coverage: 61%<br><i>pI</i> : 4.73<br>MS:22<br>MSMS:4 | Cytoplasm                                                         | [15]<br><a href="http://www.matrixscience.com">http://www.matrixscience.com</a> |
| 15      | hnRNPA1<br>P09651    | Heterogeneous nuclear ribonucleoprotein A1     | Mass: 38723<br>Mascot score: 325<br>Coverage: 46%<br><i>pI</i> : 9.17<br>MS:22<br>MSMS:5 | Nucleus.<br>Cytoplasm                                             | [15]<br><a href="http://www.matrixscience.com">http://www.matrixscience.com</a> |
| 16      | hnRNPA2/B1<br>P22626 | Heterogeneous nuclear ribonucleoproteins A2/B1 | Mass: 37407<br>Mascot score: 267<br>Coverage: 49%<br><i>pI</i> : 8.97<br>MS:19<br>MSMS:4 | Nucleus,<br>nucleoplasm.<br>Cytoplasm                             | [15]<br><a href="http://www.matrixscience.com">http://www.matrixscience.com</a> |
| 17      | ENOA                 | Alpha-enolase                                  | Mass: 37407<br>Mascot score: 331<br>Coverage 44%                                         | Cytoplasm. Cell membrane.                                         | [15]<br><a href="http://www.matrixscience.com">http://www.matrixscience.com</a> |

---

|    |                    |                                              |                                                                                            |                             |                                                                                 |
|----|--------------------|----------------------------------------------|--------------------------------------------------------------------------------------------|-----------------------------|---------------------------------------------------------------------------------|
|    |                    |                                              | <i>pI</i> : 7.01<br>MS:23<br>MSMS:5<br>Mass: 36615<br>Mascot score: 81                     |                             |                                                                                 |
| 19 | LDHB<br>P07195     | L-lactate dehydrogenase<br>B chain;          | Coverage: 46%<br><i>pI</i> : 5.71<br>MS:24<br>MSMS:6<br>Mass: 49510<br>Mascot score: 499   | Cytoplasm                   | [15]<br><a href="http://www.matrixscience.com">http://www.matrixscience.com</a> |
| 25 | EFTU<br>P49411     | Elongation factor Tu,<br>mitochondrial       | Coverage: 49%<br><i>pI</i> : 7.26<br>MS:22<br>MSMS:7<br>Mass: 50087<br>Mascot score: 389   | Mitochondrion               | [15]<br><a href="http://www.matrixscience.com">http://www.matrixscience.com</a> |
| 27 | EF1G<br>P26641     | Elongation factor 1-<br>gamma                | Coverage: 42%<br><i>pI</i> : 6.25<br>MS:23<br>MSMS:5<br>Mass: 47139<br>Mascot score: 331   |                             | [15]<br><a href="http://www.matrixscience.com">http://www.matrixscience.com</a> |
| 31 | ENOA<br>P06733     | Alpha-enolase                                | Coverage: 44%<br><i>pI</i> : 7.01<br>MS:23<br>MSMS:5<br>Mass: 57452<br>Mascot score: 91    | Cytoplasm. Cell<br>membrane | [15]<br><a href="http://www.matrixscience.com">http://www.matrixscience.com</a> |
| 32 | TCPB<br>P78371     | T-complex protein 1<br>subunit beta          | Coverage: 39%<br><i>pI</i> : 6.01<br>MS: 30<br>MSMS: 0<br>Mass: 56614<br>Mascot score: 213 | Cytoplasm                   | [15]<br><a href="http://www.matrixscience.com">http://www.matrixscience.com</a> |
| 33 | SERA<br>O43175     | D-3-phosphoglycerate<br>dehydrogenase        | Coverage: 25%<br><i>pI</i> : 6.29<br>MS: 15<br>MSMS: 4<br>Mass: 56747<br>Mascot score: 521 | Cytosol                     | [15]<br><a href="http://www.matrixscience.com">http://www.matrixscience.com</a> |
| 35 | ERp57<br>P30101    | Endoplasmic reticulum<br>resident protein 57 | Coverage: 48%<br><i>pI</i> : 5.98<br>MS: 6<br>MSMS: 31<br>Mass: 53619<br>Mascot score: 609 | Endoplasmic<br>reticulum    | [15]<br><a href="http://www.matrixscience.com">http://www.matrixscience.com</a> |
| 36 | VIME<br>P08670     | Vimentin                                     | Coverage: 75%<br><i>pI</i> : 5.06<br>MS: 51<br>MSMS: 4<br>Mass: 59329<br>Mascot score: 84  | Cytoplasm                   | [15]<br><a href="http://www.matrixscience.com">http://www.matrixscience.com</a> |
| 39 | TCPH<br>Q99832     | T-complex protein 1<br>subunit eta           | Coverage: 25%<br><i>pI</i> : 7.55<br>MS: 19<br>MSMS: 2<br>Mass: 70854<br>Mascot score: 705 | Cytoplasm                   | [15]<br><a href="http://www.matrixscience.com">http://www.matrixscience.com</a> |
| 45 | HSP7C<br>P11142    | Heat shock cognate 71<br>kDa protein         | Coverage: 62%<br><i>pI</i> : 5.37<br>MS: 45<br>MSMS: 6<br>Mass: 73635<br>Mascot score: 189 | Cytoplasm                   | [15]<br><a href="http://www.matrixscience.com">http://www.matrixscience.com</a> |
| 46 | Mortalin<br>P38646 | Stress-70 protein                            | Coverage: 17%                                                                              | Mitochondrion               | [15]<br><a href="http://www.matrixscience.com">http://www.matrixscience.com</a> |

---

|    |                      |                                                |                                                                                            |                              |                                                                                 |
|----|----------------------|------------------------------------------------|--------------------------------------------------------------------------------------------|------------------------------|---------------------------------------------------------------------------------|
|    |                      |                                                | <i>pI</i> : 5.87<br>MS: 10<br>MSMS: 5<br>Mass: 72288                                       |                              |                                                                                 |
| 47 | BIP<br>P11021        | Immunoglobulin heavy chain-binding             | Mascot score: 345<br>Coverage: 46%<br><i>pI</i> : 5.07<br>MS: 33<br>MSMS:6<br>Mass: 83212  | Endoplasmic reticulum lumen  | [15]<br><a href="http://www.matrixscience.com">http://www.matrixscience.com</a> |
| 51 | HSP90B<br>P08238     | Heat shock protein HSP 90-beta                 | Mascot score: 623<br>Coverage: 40%<br><i>pI</i> : 4.97<br>MS: 37<br>MSMS:7<br>Mass: 95277  |                              | [15]<br><a href="http://www.matrixscience.com">http://www.matrixscience.com</a> |
| 52 | EF2<br>P13639        | Elongation factor 2                            | Mascot score: 431<br>Coverage: 32%<br><i>pI</i> : 6.41<br>MS: 47<br>MSMS:7<br>Mass: 92411  |                              | [15]<br><a href="http://www.matrixscience.com">http://www.matrixscience.com</a> |
| 54 | GRP94<br>P14625      | 94 kDa glucose-regulated protein               | Mascot score: 99<br>Coverage: 22%<br><i>pI</i> : 4.76<br>MS: 18<br>MSMS:2<br>Mass: 83626   | Endoplasmic reticulum lumen  | [15]<br><a href="http://www.matrixscience.com">http://www.matrixscience.com</a> |
| 55 | IMMT<br>Q16891       | Mitochondrial inner membrane protein           | Mascot score: 136<br>Coverage: 29%<br><i>pI</i> : 6.08<br>MS: 23<br>MSMS:1<br>Mass: 17138  | Mitochondrion inner membrane | [15]<br><a href="http://www.matrixscience.com">http://www.matrixscience.com</a> |
| 63 | NM23<br>P15531       | Metastasis inhibition factor nm23              | Mascot score: 405<br>Coverage: 60%<br><i>pI</i> : 5.83<br>MS: 12<br>MSMS:6<br>Mass: 25019  | Cytoplasm                    | [15]<br><a href="http://www.matrixscience.com">http://www.matrixscience.com</a> |
| 66 | PRDX6<br>P30041      | Peroxiredoxin-6                                | Mascot score: 342<br>Coverage: 51%<br><i>pI</i> : 6.00<br>MS: 15<br>MSMS:5<br>Mass: 28415  | Cytoplasm                    | [15]<br><a href="http://www.matrixscience.com">http://www.matrixscience.com</a> |
| 69 | PSA3<br>P25788       | Proteasome subunit alpha type-3                | Mascot score: 125<br>Coverage: 50%<br><i>pI</i> : 5.19<br>MS: 15<br>MSMS: 3<br>Mass: 37407 | Cytoplasm                    | [15]<br><a href="http://www.matrixscience.com">http://www.matrixscience.com</a> |
| 76 | hnRNPA2/B1<br>P22626 | Heterogeneous nuclear ribonucleoproteins A2/B1 | Mascot score: 220<br>Coverage: 55%<br><i>pI</i> : 8.97<br>MS: 20<br>MSMS: 2<br>Mass: 62599 | Nucleus, nucleoplasm         | [15]<br><a href="http://www.matrixscience.com">http://www.matrixscience.com</a> |
| 88 | Hop<br>P31948        | Hsc70/Hsp90-organizing protein                 | Mascot score: 375<br>Coverage: 52%<br><i>pI</i> : 6.40<br>MS: 45<br>MSMS: 6<br>Mass: 81257 | Cytoplasm (By similarity).   | [15]<br><a href="http://www.matrixscience.com">http://www.matrixscience.com</a> |
| 89 | MCM7<br>P33993       | DNA replication licensing factor MCM7          | Mascot score: 214<br>Coverage: 54%                                                         | Nucleus (By similarity)      | [15]<br><a href="http://www.matrixscience.com">http://www.matrixscience.com</a> |

|     |                 |                                                          |                                                                                           |                                                                                              |                                                                                 |
|-----|-----------------|----------------------------------------------------------|-------------------------------------------------------------------------------------------|----------------------------------------------------------------------------------------------|---------------------------------------------------------------------------------|
|     |                 |                                                          | <i>pI</i> : 6.08<br>MS: 40<br>MSMS:3<br>Mass: 35055                                       |                                                                                              |                                                                                 |
| 94  | GBLP<br>P63244  | Guanine nucleotide-binding protein subunit beta-2-like 1 | Mascot score: 189<br>Coverage: 37%<br><i>pI</i> : 7.60<br>MS: 16<br>MSMS:2<br>Mass: 40397 | Cell membrane; Peripheral membrane protein.                                                  | [15]<br><a href="http://www.matrixscience.com">http://www.matrixscience.com</a> |
| 95  | PSAT<br>Q9Y617  | Phosphohydroxythreonine aminotransferase                 | Mascot score: 437<br>Coverage: 41%<br><i>pI</i> : 7.56<br>MS: 21<br>MSMS:7<br>Mass: 53619 | (UniPortKB 2014) ( <a href="http://www.matrixscience.com">http://www.matrixscience.com</a> ) | [15]<br><a href="http://www.matrixscience.com">http://www.matrixscience.com</a> |
| 96  | VIME<br>P08670  | Vimentin                                                 | Mascot score: 452<br>Coverage: 71%<br><i>pI</i> : 5.06<br>MS: 48<br>MSMS:7<br>Mass: 59714 | Cytoplasm.                                                                                   | [15]<br><a href="http://www.matrixscience.com">http://www.matrixscience.com</a> |
| 97  | ATPA<br>P25705  | ATP synthase subunit alpha, mitochondrial                | Mascot score: 363<br>Coverage: 56%<br><i>pI</i> : 9.16<br>MS: 32<br>MSMS:5<br>Mass: 50196 | Mitochondrion inner membrane                                                                 | [15]<br><a href="http://www.matrixscience.com">http://www.matrixscience.com</a> |
| 102 | RUVB1<br>Q9Y265 | RuvB-like 1                                              | Mascot score: 106<br>Coverage: 24%<br><i>pI</i> : 6.02<br>MS: 17<br>MSMS:4<br>Mass: 60306 | Nucleus matrix                                                                               | [15]<br><a href="http://www.matrixscience.com">http://www.matrixscience.com</a> |
| 105 | TCPA<br>P17987  | T-complex protein 1 subunit alpha                        | Mascot score: 167<br>Coverage: 43%<br><i>pI</i> : 5.80<br>MS: 21<br>MSMS:3<br>Mass: 29228 | Cytoplasm                                                                                    | [15]<br><a href="http://www.matrixscience.com">http://www.matrixscience.com</a> |
| 108 | CAH2<br>P00918  | Carbonic anhydrase 2                                     | Mascot score: 159<br>Coverage: 27%<br><i>pI</i> : 6.87<br>MS: 7<br>MSMS:3<br>Mass: 48603  | Cytoplasm                                                                                    | [15]<br><a href="http://www.matrixscience.com">http://www.matrixscience.com</a> |
| 116 | PRS7<br>P35998  | 26S protease regulatory subunit 7                        | Mascot score: 98<br>Coverage: 45%<br><i>pI</i> : 5.71<br>MS: 20<br>MSMS: 1                | Cytoplasm                                                                                    | [15]<br><a href="http://www.matrixscience.com">http://www.matrixscience.com</a> |

\* Accession number, protein ID, names and Mass, MSMS, coverage and protein score were obtained from APAF (<http://www.proteome.org.au/>); \*Theoretical isoelectric point (*pI*), subcellular location mass spectrum and matched peptides were obtained from Mascot database (<http://www.matrixscience.com>), SwissProt database), (<http://www.uniprot.org/>) .

[15]; \*Protein scores from Mascot database (<http://www.matrixscience.com>) through APAF (<http://www.proteome.org.au/>).
